# Supplementary material for: Health, Work, and Social Problems in Spanish Informal Caregivers: Does Gender Matter? (The CUIDAR-SE Study)
Source: MDPI journal article supplement (doi:10.3390/ijerph18147332), 2021-07-08
Supplement: s1 [file s1]

# Supplementary Materials

Table S1. Analysis of health problems (full sample)

|                                                         | Deteriorated health     |              | Needs treatment         |              | Feels tired             |              | Feels depressed         |              | Other health-related problem |              |
|---------------------------------------------------------|-------------------------|--------------|-------------------------|--------------|-------------------------|--------------|-------------------------|--------------|------------------------------|--------------|
|                                                         | Odds Ratio<br>(SE)      | P<br>value   | Odds Ratio<br>(SE)           | P<br>value   |
| Women                                                   | <b>1.611</b><br>(0.377) | <b>0.041</b> | <b>2.536</b><br>(0.774) | <b>0.002</b> | <b>3.301</b><br>(0.735) | <b>0.000</b> | <b>1.839</b><br>(0.448) | <b>0.013</b> | <b>0.615</b><br>(0.187)      | <b>0.112</b> |
| Age (50-64)                                             | 0.950<br>(0.278)        | 0.861        | 0.721<br>(0.255)        | 0.356        | 0.919<br>(0.250)        | 0.759        | 0.690<br>(0.206)        | 0.216        | 0.956<br>(0.361)             | 0.906        |
| Age (≥65 years)                                         | 0.718<br>(0.250)        | 0.344        | 0.614<br>(0.266)        | 0.262        | 0.953<br>(0.305)        | 0.883        | <b>0.494</b><br>(0.179) | <b>0.052</b> | <b>0.884</b><br>(0.408)      | <b>0.790</b> |
| Years spent providing care                              | 1.021<br>(0.014)        | 0.137        | 0.995<br>(0.016)        | 0.802        | 0.969<br>(0.012)        | 0.018        | <b>0.978</b><br>(0.014) | <b>0.153</b> | <b>0.999</b><br>(0.019)      | <b>0.969</b> |
| Primary education                                       | 1.583<br>(0.488)        | 0.136        | 1.319<br>(0.509)        | 0.474        | 0.898<br>(0.258)        | 0.711        | 0.949<br>(0.300)        | 0.870        | 0.969<br>(0.417)             | 0.943        |
| Secondary/ third-level education                        | 1.455<br>(0.454)        | 0.229        | <b>2.176</b><br>(0.833) | <b>0.042</b> | 1.287<br>(0.373)        | 0.383        | 1.038<br>(0.334)        | 0.905        | 1.511<br>(0.633)             | 0.324        |
| Average adjusted monthly household income (€1000–€1500) | 1.296<br>(0.344)        | 0.329        | 1.568<br>(0.493)        | 0.153        | 1.257<br>(0.312)        | 0.356        | 1.284<br>(0.346)        | 0.354        | 0.769<br>(0.263)             | 0.445        |
| High adjusted monthly household income (>€1500)         | 1.648<br>(0.556)        | 0.139        | 0.954<br>(0.425)        | 0.917        | 1.487<br>(0.453)        | 0.192        | 1.437<br>(0.497)        | 0.294        | 0.608<br>(0.270)             | 0.264        |
| Living in Granada                                       | <b>2.982</b><br>(0.830) | <b>0.000</b> | 1.645<br>(0.594)        | 0.168        | <b>2.286</b><br>(0.592) | <b>0.001</b> | 1.348<br>(0.396)        | 0.309        | 0.936<br>(0.303)             | 0.839        |
| Caregiver HRQoL (high)                                  | <b>0.197</b><br>(0.046) | <b>0.000</b> | <b>0.178</b><br>(0.053) | <b>0.000</b> | <b>0.298</b><br>(0.069) | <b>0.000</b> | <b>0.219</b><br>(0.053) | <b>0.000</b> | 0.936<br>(0.303)             | 0.839        |
| Poor care recipient health as perceived by caregiver    | <b>2.668</b><br>(0.675) | <b>0.000</b> | 1.697<br>(0.576)        | 0.119        | <b>1.583</b><br>(0.355) | <b>0.040</b> | <b>1.799</b><br>(0.487) | <b>0.030</b> | 1.183<br>(0.393)             | 0.612        |
| Ungratifying tasks                                      | <b>2.334</b><br>(0.545) | <b>0.000</b> | 1.473<br>(0.432)        | 0.186        | <b>1.583</b><br>(0.336) | <b>0.030</b> | 1.203<br>(0.287)        | 0.437        | <b>2.349</b><br>(0.743)      | <b>0.007</b> |
| High perceived social support                           | <b>0.426</b><br>(0.117) | <b>0.002</b> | <b>0.374</b><br>(0.114) | <b>0.001</b> | <b>0.429</b><br>(0.121) | <b>0.003</b> | <b>0.354</b><br>(0.094) | <b>0.000</b> | 1.312<br>(0.520)             | 0.493        |
| Health and social care services at home                 | 0.854<br>(0.307)        | 0.661        | 0.786<br>(0.362)        | 0.602        | 0.609<br>(0.190)        | 0.113        | 0.684<br>(0.259)        | 0.319        | 1.532<br>(0.754)             | 0.387        |
| Health and social care services outside the home        | 1.711<br>(0.506)        | 0.069        | <b>2.066</b><br>(0.712) | <b>0.035</b> | <b>1.877</b><br>(0.526) | <b>0.025</b> | 1.531<br>(0.457)        | 0.154        | 0.650<br>(0.272)             | 0.304        |
| Allowances                                              | 1.093<br>(0.319)        | 0.760        | 1.137<br>(0.386)        | 0.705        | 0.911<br>(0.263)        | 0.748        | 0.942<br>(0.271)        | 0.837        | 0.930<br>(0.356)             | 0.851        |
| Other services                                          | <b>0.961</b><br>(0.174) | <b>0.041</b> | 0.864<br>(0.306)        | 0.681        | 1.378<br>(0.348)        | 0.204        | 1.429<br>(0.428)        | 0.234        | 0.701<br>(0.249)             | 0.318        |
| N                                                       | 529                     |              | 529                     |              | 529                     |              | 529                     |              | 529                          |              |
| LR chi2                                                 | 192.70                  |              | 100.89                  |              | 146.30                  |              | 113.90                  |              | 15.74                        |              |
| Pseudo R2                                               | 0.2699                  |              | 0.2133                  |              | 0.1999                  |              | 0.1851                  |              | 0.0435                       |              |

Table S2. Analysis of work and financial problems (all sample)

|                                                         | Cannot work                      |              | Difficulty meeting work schedules |              | Financial difficulties         |              |
|---------------------------------------------------------|----------------------------------|--------------|-----------------------------------|--------------|--------------------------------|--------------|
|                                                         | Odds Ratio (SE)                  | P value      | Odds Ratio (SE)                   | P value      | Odds Ratio (SE)                | P value      |
| Woman                                                   | <b>3.611</b><br><b>(1.410)</b>   | <b>0.001</b> | 0.841<br>(0.258)                  | 0.574        | 1.033<br>(0.212)               | 0.873        |
| Age (50-64)                                             | 2.224<br>(0.841)                 | 0.035        | 0.695<br>(0.220)                  | 0.251        | <b>0.569</b><br><b>(0.149)</b> | <b>0.031</b> |
| Age (≥65 years)                                         | -----                            | ----         | -----                             | ----         | <b>0.528</b><br><b>(0.160)</b> | <b>0.035</b> |
| Years spent providing care                              | 0.961<br>(0.026)                 | 0.153        | 1.010<br>(0.023)                  | 0.574        | 1.000<br>(0.122)               | 0.957        |
| Primary education                                       | 0.900<br>(0.454)                 | 0.836        | 1.025<br>(0.494)                  | 0.958        | <b>1.717</b><br><b>(0.469)</b> | <b>0.048</b> |
| Secondary/ third-level education                        | 0.289<br>(0.141)                 | 0.011        | 2.104<br>(0.947)                  | 0.098        | <b>1.734</b><br><b>(0.481)</b> | <b>0.047</b> |
| Average adjusted monthly household income (€1000–€1500) | <b>0.469</b><br><b>(0.189)</b>   | <b>0.061</b> | 2.206<br>(0.758)                  | 0.021        | 1.078<br>(0.249)               | 0.743        |
| High adjusted monthly household income (>€1500)         | 0.396<br>(0.216)                 | 0.089        | 1.792<br>(0.763)                  | 0.171        | 0.793<br>(0.235)               | 0.435        |
| Living in Granada                                       | <b>24.569</b><br><b>(12.352)</b> | <b>0.000</b> | 0.715<br>(0.281)                  | 0.394        | <b>2.186</b><br><b>(0.540)</b> | <b>0.002</b> |
| Caregiver HRQoL (high)                                  | 1.207<br>(0.436)                 | 0.601        | 1.046<br>(0.346)                  | 0.890        | <b>0.645</b><br><b>(0.139)</b> | <b>0.043</b> |
| Poor care recipient health as perceived by caregiver    | <b>2.505</b><br><b>(0.952)</b>   | <b>0.016</b> | 0.839<br>(0.264)                  | 0.580        | <b>2.125</b><br><b>(0.469)</b> | <b>0.001</b> |
| Ungratifying tasks                                      | 1.087<br>(0.402)                 | 0.821        | 0.879<br>(0.265)                  | 0.671        | <b>1.824</b><br><b>(0.375)</b> | <b>0.003</b> |
| High perceived social support                           | 0.185<br>(0.085)                 | 0.000        | 2.026<br>(0.758)                  | 0.076        | 0.730<br>(0.183)               | 0.212        |
| Health and social care services at home                 | 0.231<br>(0.139)                 | 0.015        | 1.474<br>(0.652)                  | 0.380        | <b>0.463</b><br><b>(0.139)</b> | <b>0.011</b> |
| Health and social care services outside the home        | 0.720<br>(0.335)                 | 0.482        | 1.156<br>(0.422)                  | 0.691        | 0.960<br>(0.254)               | 0.878        |
| Allowances                                              | <b>3.463</b><br><b>(1.571)</b>   | <b>0.006</b> | <b>0.313</b><br><b>(0.122)</b>    | <b>0.003</b> | 0.996<br>(0.258)               | 0.989        |
| Other services                                          | 1.002<br>(0.495)                 | 0.995        | 0.848<br>(0.304)                  | 0.647        | 1.183<br>(0.291)               | 0.495        |
| N                                                       | 293                              |              | 293                               |              | 525                            |              |
| LR chi2                                                 | 176.71                           |              | 35.53                             |              | 88.93                          |              |
| Pseudo R2                                               | 0.4382                           |              | 0.1046                            |              | 0.1234                         |              |

Table S3. Analysis of problems with social and family relationships (all sample)

|                                                         | Less time for social activities/no holidays |              | No time for self-care or to care for others |              | No time to see friends |              | Deterioration in relationship with care recipient |              | Deterioration in relationship with family/partner |              |
|---------------------------------------------------------|---------------------------------------------|--------------|---------------------------------------------|--------------|------------------------|--------------|---------------------------------------------------|--------------|---------------------------------------------------|--------------|
|                                                         | Odds Ratio (SE)                             | P value      | Odds Ratio (SE)                             | P value      | Odds Ratio (SE)        | P value      | Odds Ratio (SE)                                   | P value      | Odds Ratio (SE)                                   | P value      |
| Woman                                                   | 1.395 (0.286)                               | 0.104        | 1.572 (0.336)                               | 0.050        | <b>1.541 (0.328)</b>   | <b>0.042</b> | 1.415 (0.517)                                     | 0.342        | 1.668 (0.736)                                     | 0.246        |
| Age (50-64)                                             | 1.232 (0.320)                               | 0.423        | 1.076 (0.309)                               | 0.797        | 1.218 (0.331)          | 0.467        | 1.171 (0.546)                                     | 0.735        | 0.840 (0.408)                                     | 0.721        |
| Age (≥65 years)                                         | 1.077 (0.325)                               | 0.805        | 0.814 (0.276)                               | 0.546        | 0.897 (0.282)          | 0.731        | 1.243 (0.681)                                     | 0.691        | 0.376 (0.255)                                     | 0.149        |
| Years spent providing care                              | 0.979 (0.011)                               | 0.084        | 0.972 (0.013)                               | 0.051        | 0.986 (0.012)          | 0.294        | 1.019 (0.019)                                     | 0.297        | 0.996 (0.025)                                     | 0.896        |
| Primary education                                       | 0.869 (0.236)                               | 0.607        | 0.866 (0.261)                               | 0.635        | 1.059 (0.300)          | 0.837        | 1.593 (0.794)                                     | 0.350        | 0.865 (0.538)                                     | 0.816        |
| Secondary/ third-level education                        | 1.352 (0.371)                               | 0.271        | 1.123 (0.346)                               | 0.706        | <b>1.942 (0.569)</b>   | <b>0.023</b> | 1.772 (0.889)                                     | 0.254        | 1.727 (0.967)                                     | 0.328        |
| Average adjusted monthly household income (€1000–€1500) | 0.985 (0.226)                               | 0.949        | 0.748 (0.192)                               | 0.259        | 1.263 (0.307)          | 0.337        | 1.167 (0.483)                                     | 0.708        | 0.696 (0.348)                                     | 0.470        |
| High adjusted monthly household income (>€1500)         | 1.271 (0.367)                               | 0.405        | 0.796 (0.260)                               | 0.487        | 1.201 (0.358)          | 0.538        | 1.266 (0.641)                                     | 0.641        | 0.823 (0.518)                                     | 0.758        |
| Living in Granada                                       | <b>1.780 (0.434)</b>                        | <b>0.018</b> | <b>5.888 (1.653)</b>                        | <b>0.000</b> | <b>3.599 (0.931)</b>   | <b>0.000</b> | <b>0.371 (0.170)</b>                              | <b>0.031</b> | 1.033 (0.573)                                     | 0.952        |
| Caregiver HRQoL (high)                                  | <b>0.595 (0.130)</b>                        | <b>0.018</b> | <b>0.480 (0.112)</b>                        | <b>0.002</b> | <b>0.449 (0.104)</b>   | <b>0.001</b> | <b>0.461 (0.175)</b>                              | <b>0.042</b> | <b>0.664 (0.286)</b>                              | <b>0.344</b> |
| Poor care recipient health as perceived by caregiver    | <b>1.921 (0.403)</b>                        | <b>0.002</b> | <b>2.512 (0.610)</b>                        | <b>0.000</b> | 1.384 (0.303)          | 0.139        | 2.100 (0.910)                                     | 0.087        | 2.370 (1.300)                                     | 0.116        |
| Ungratifying tasks                                      | <b>2.208 (0.447)</b>                        | <b>0.000</b> | <b>2.978 (0.688)</b>                        | <b>0.000</b> | <b>1.901 (0.402)</b>   | <b>0.002</b> | 1.125 (0.411)                                     | 0.747        | 1.474 (0.650)                                     | 0.379        |
| High perceived social support                           | <b>0.437 (0.117)</b>                        | <b>0.002</b> | <b>0.397 (0.113)</b>                        | <b>0.001</b> | <b>0.367 (0.108)</b>   | <b>0.001</b> | <b>0.142 (0.054)</b>                              | <b>0.000</b> | <b>0.143 (0.062)</b>                              | <b>0.000</b> |
| Health and social care services at home                 | 0.867 (0.253)                               | 0.626        | <b>0.395 (0.131)</b>                        | <b>0.005</b> | 0.849 (0.255)          | 0.588        | 0.764 (0.390)                                     | 0.600        | 0.703 (0.418)                                     | 0.554        |
| Health and social care services outside the home        | 0.827 (0.216)                               | 0.469        | 1.737 (0.521)                               | 0.066        | 1.246 (0.342)          | 0.422        | 1.899 (0.791)                                     | 0.124        | 2.373 (1.141)                                     | 0.072        |
| Allowances                                              | 1.376 (0.365)                               | 0.229        | 1.042 (0.298)                               | 0.885        | 1.391 (0.395)          | 0.244        | 0.672 (0.304)                                     | 0.382        | <b>0.370 (0.183)</b>                              | <b>0.045</b> |
| Other services                                          | 0.949 (0.224)                               | 0.827        | 0.694 (0.190)                               | 0.185        | 0.733 (0.182)          | 0.212        | 0.629 (0.257)                                     | 0.258        | 0.556 (0.270)                                     | 0.227        |
| N                                                       | 528                                         |              | 528                                         |              | 526                    |              | 515                                               |              | 529                                               |              |
| LR chi2                                                 | 83.44                                       |              | 193.07                                      |              | 115.13                 |              | 48.67                                             |              | 51.55                                             |              |
| Pseudo R2                                               | 0.1151                                      |              | 0.2663                                      |              | 0.1618                 |              | 0.1594                                            |              | 0.2087                                            |              |
